# Supplementary material
Source: bioRxiv or medRxiv preprint supplement (https://medrxiv.org/highwire/filestream/80823/field_highwire_adjunct_files/5/2020.05.10.20097451-6.pdf)
Supplement: Supplementary file [file 2020.05.10.20097451-6.pdf]

Supplemental Table 7

| Geography (Primary organization)                                                          | Source                                                                                                                                                                                                                                                                                                                                                                                                                                                                               |
|-------------------------------------------------------------------------------------------|--------------------------------------------------------------------------------------------------------------------------------------------------------------------------------------------------------------------------------------------------------------------------------------------------------------------------------------------------------------------------------------------------------------------------------------------------------------------------------------|
| Santa Clara Valley, California, United States<br>(Stanford University School of Medicine) | Eran Bendavid, Bianca Mulaney, Neeraj Sood, et al. (20/04/17).<br>COVID-19 Antibody Seroprevalence in Santa Clara County, California.<br><a href="https://www.medrxiv.org/content/10.1101/2020.04.14.20062463v2">https://www.medrxiv.org/content/10.1101/2020.04.14.20062463v2</a>                                                                                                                                                                                                   |
| Scotland<br>(University of Oxford)                                                        | Craig Thompson, Nicholas Grayson, Robert Patonet, et al. (20/04/17).<br>Neutralising antibodies to SARS coronavirus 2 in Scottish blood donors - a pilot study of the value of serology to determine population exposure.<br><a href="https://www.medrxiv.org/content/10.1101/2020.04.13.20060467v1">https://www.medrxiv.org/content/10.1101/2020.04.13.20060467v1</a>                                                                                                               |
| Oise, France<br>(Institut Pasteur; Sorbonne Université; Université de Paris)              | Arnaud Fontanet, Laura Tondeur, Yoann Madec, et al. (20/04/23).<br>Cluster of COVID-19 in northern France: A retrospective closed cohort study.<br><a href="https://www.medrxiv.org/content/10.1101/2020.04.18.20071134v1">https://www.medrxiv.org/content/10.1101/2020.04.18.20071134v1</a>                                                                                                                                                                                         |
| Paris, Oise, France<br>(Institut Pasteur; Bichat-Claude Bernard University Hospital)      | Ludivine Grzelak, Sarah Temmam, Cyril Planchais, et al. (20/04/24).<br>SARS-CoV-2 serological analysis of COVID-19 hospitalized patients, pauci-symptomatic individuals and blood donors.<br><a href="https://www.medrxiv.org/content/10.1101/2020.04.21.20068858v1">https://www.medrxiv.org/content/10.1101/2020.04.21.20068858v1</a>                                                                                                                                               |
| Denmark<br>(Aarhus University)                                                            | Christian Erikstrup, Christoffer Egeberg Hother, Ole Birger Vestager Pedersen, et al. (20/04/28).<br>Estimation of SARS-CoV-2 infection fatality rate by real-time antibody screening of blood donors.<br><a href="https://www.medrxiv.org/content/10.1101/2020.04.24.20075291v1">https://www.medrxiv.org/content/10.1101/2020.04.24.20075291v1</a>                                                                                                                                  |
| New York, United States<br>(New York State Department of Health)                          | Otago Daily Times (20/04/24).<br>More than 20% of New Yorkers have had Covid-19 - Governor.<br><a href="https://www.odt.co.nz/news/world/more-20-new-yorkers-have-had-covid-19-governor">https://www.odt.co.nz/news/world/more-20-new-yorkers-have-had-covid-19-governor</a>                                                                                                                                                                                                         |
| New York City, New York, United States<br>(New York State Department of Health)           | Goodman JD, Rothfeld M (NYT) (20/04/23).<br>1 in 5 New Yorkers May Have Had Covid-19, Antibody Tests Suggest.<br><a href="https://www.nytimes.com/2020/04/23/nyregion/coronavirus-antibodies-test-ny.html">https://www.nytimes.com/2020/04/23/nyregion/coronavirus-antibodies-test-ny.html</a>                                                                                                                                                                                       |
| United States<br>(National Institutes for Health)                                         | Kaitlyn Sadtler (20/04/10).<br>NIH begins study to quantify undetected cases of coronavirus infection.<br><a href="https://www.nih.gov/news-events/news-releases/nih-begins-study-quantify-undetected-cases-coronavirus-infection">https://www.nih.gov/news-events/news-releases/nih-begins-study-quantify-undetected-cases-coronavirus-infection</a>                                                                                                                                |
| Guilan, Iran<br>(Guilan University of Medical Sciences)                                   | Maryam Shakiba, Seyed Saeed Hashemi Nazari, Fardin Mehrabian, et al. (20/05/01).<br>Seroprevalence of COVID-19 virus infection in Guilan province, Iran.<br><a href="https://www.medrxiv.org/content/10.1101/2020.04.26.20079244v1">https://www.medrxiv.org/content/10.1101/2020.04.26.20079244v1</a>                                                                                                                                                                                |
| Kobe, Hyogo Prefecture, Japan<br>(Kobe City Medical Center General Hospital)              | Asako Doi, Kentaro Iwata, Hirokazu Kuroda, et al. (20/05/01).<br>Estimation of seroprevalence of novel coronavirus disease (COVID-19) using preserved serum at an outpatient setting in Kobe, Japan: A cross-sectional study.<br><a href="https://www.medrxiv.org/content/10.1101/2020.04.26.20079822v1">https://www.medrxiv.org/content/10.1101/2020.04.26.20079822v1</a>                                                                                                           |
| Brevard County, Melbourne, Florida, United States<br>(OMNI Healthcare)                    | Erin Dobrzyn (20/04/16).<br>New test to determine coronavirus immunity<br><a href="https://www.clickorlando.com/news/local/2020/04/16/new-test-to-determine-coronavirus-immunity-coming-to-melbourne/">https://www.clickorlando.com/news/local/2020/04/16/new-test-to-determine-coronavirus-immunity-coming-to-melbourne/</a>                                                                                                                                                        |
| Finland<br>(Finland Institute for Health and Welfare)                                     | Yle News (20/04/07).<br>Finland rolls out nationwide coronavirus antibody testing effort.<br><a href="https://yle.fi/uutiset/osasto/news/finland_rolls_out_nationwide_coronavirus_antibody_testing_effort/11296520">https://yle.fi/uutiset/osasto/news/finland_rolls_out_nationwide_coronavirus_antibody_testing_effort/11296520</a>                                                                                                                                                 |
| United Kingdom<br>(Department for Health and Social Care; Office for National Statistics) | UK Government (20/04/23).<br>Government begins large-scale virus infection and antibody test study.<br><a href="https://www.gov.uk/government/news/government-begins-large-scale-virus-infection-and-antibody-test-study">https://www.gov.uk/government/news/government-begins-large-scale-virus-infection-and-antibody-test-study</a>                                                                                                                                               |
| Chelsea, Massachusetts, United States<br>(Massachusetts General Hospital)                 | Anaridis Rodriguez (20/04/23).<br>MGH Coronavirus Case Study In Chelsea Will Help Researchers Understand Immunity.<br><a href="https://boston.cbslocal.com/2020/04/23/coronavirus-mgh-case-study-john-iafrate-herd-immunity/">https://boston.cbslocal.com/2020/04/23/coronavirus-mgh-case-study-john-iafrate-herd-immunity/</a>                                                                                                                                                      |
| Washington, United States<br>(Washington State Government)                                | Daily Chronicle (20/04/22).<br>Sen. Braun Proposes Random Testing of 25,000 Washingtonians for COVID-19 Antibodies.<br><a href="http://www.chronline.com/community/sen-braun-proposes-random-testing-of-25-000-washingtonians-for-covid-19-antibodies/article_dedfa2e6-84bf-11ea-bcbe-c3349d3e2f26.html">http://www.chronline.com/community/sen-braun-proposes-random-testing-of-25-000-washingtonians-for-covid-19-antibodies/article_dedfa2e6-84bf-11ea-bcbe-c3349d3e2f26.html</a> |
| Santa Clara Valley, Palo Alto, California, United States<br>(Stanford Health Care)        | Lisa M. Krieger (20/04/08).<br>Coronavirus: Stanford deploys new test...<br><a href="https://www.mercurynews.com/coronavirus-stanford-deploys-new-test-that-tells-healthcare-workers-if-theyve-been-exposed">https://www.mercurynews.com/coronavirus-stanford-deploys-new-test-that-tells-healthcare-workers-if-theyve-been-exposed</a>                                                                                                                                              |

Supplemental Table 7

| Geography (Primary organization)                                                             | Source                                                                                                                                                                                                                                                                                                                                                                                                                                                                                                                            |
|----------------------------------------------------------------------------------------------|-----------------------------------------------------------------------------------------------------------------------------------------------------------------------------------------------------------------------------------------------------------------------------------------------------------------------------------------------------------------------------------------------------------------------------------------------------------------------------------------------------------------------------------|
| Andorra<br>(Andorra Government)                                                              | Tim Stickings (20/04/02).<br>Andorra (population 77000) orders 150000 antibody tests ....<br><a href="https://www.dailymail.co.uk/news/article-8180695/Andorra-orders-150-000-antibody-tests-South-Korea.html">https://www.dailymail.co.uk/news/article-8180695/Andorra-orders-150-000-antibody-tests-South-Korea.html</a>                                                                                                                                                                                                        |
| Brevard County, Florida, United States<br>(OMNI Healthcare)                                  | Sassoon M (20/04/24).<br>OMNI Healthcare's COVID-19 antibody testing data ....<br><a href="https://www.floridatoday.com/story/news/2020/04/24/omni-covid-19-immunity-testing-data-brevard-county-florida-antibody/3022571001/">https://www.floridatoday.com/story/news/2020/04/24/omni-covid-19-immunity-testing-data-brevard-county-florida-antibody/3022571001/</a>                                                                                                                                                             |
| Hawaii, United States<br>(Hawaii State Government)                                           | Dible M (20/04/29).<br>Antibody Tests Now Available Statewide.<br><a href="https://bigislandnow.com/2020/04/29/antibody-tests-now-available-statewide/">https://bigislandnow.com/2020/04/29/antibody-tests-now-available-statewide/</a>                                                                                                                                                                                                                                                                                           |
| New York City, New York, United States<br>(New York State Department of Health)              | CBSN New York (20/04/27).<br>Coronavirus Antibodies Present In Nearly 25% Of All NYC Residents, Cuomo Says...<br><a href="https://newyork.cbslocal.com/2020/04/27/coronavirus-antibodies-present-in-nearly-25-of-all-nyc-residents/">https://newyork.cbslocal.com/2020/04/27/coronavirus-antibodies-present-in-nearly-25-of-all-nyc-residents/</a>                                                                                                                                                                                |
| Padova, Veneto, Italy<br>(University Hospital of Padova)                                     | Francesca Tosato, Michela Pelloso, Nicoletta Gallo, et al. (20/05/01).<br>Severe Acute Respiratory Syndrome Coronavirus 2 Serology in Asymptomatic Healthcare Professionals: Preliminary Experience of a Tertiary Italian Academic Center.<br><a href="https://www.medrxiv.org/content/10.1101/2020.04.27.20073858v1?fbclid=IwAR1eaO6EDgyYioEgSSfjuVXf44yVAmDUc6nnY72tqhi72WT4gzHT16II7Qk">https://www.medrxiv.org/content/10.1101/2020.04.27.20073858v1?fbclid=IwAR1eaO6EDgyYioEgSSfjuVXf44yVAmDUc6nnY72tqhi72WT4gzHT16II7Qk</a> |
| Vienna, Austria<br>(Medical University of Vienna)                                            | Thomas J Reiter, MD (20/04/15).<br>COVID-19 Serology in Nephrology Health Care Workers.<br><a href="https://clinicaltrials.gov/show/NCT04347694">https://clinicaltrials.gov/show/NCT04347694</a>                                                                                                                                                                                                                                                                                                                                  |
| Netherlands<br>(National Institute for Public Health and the Environment (RIVM))             | Wijmenga-Monsuur (20/03/23).<br>Third population-based immune surveillance study used for the evaluation of immunity against SARS-CoV-2.<br><a href="https://trialregister.nl/trial/8473">https://trialregister.nl/trial/8473</a>                                                                                                                                                                                                                                                                                                 |
| India<br>(Indian Council for Medical Research)                                               | Srishti Choudhary (20/04/29).<br>Serological tests: One more tool in India's fight against Covid-19.<br><a href="https://www.livemint.com/news/india/serological-tests-one-more-tool-in-india-s-fight-against-covid-19-11585487842511.html">https://www.livemint.com/news/india/serological-tests-one-more-tool-in-india-s-fight-against-covid-19-11585487842511.html</a>                                                                                                                                                         |
| Lombardy, Italy<br>(National Health Council)                                                 | Alexandria Sage (20/04/23).<br>Italy launches antibody tests for virus immunity in hard-hit Lombardy.<br><a href="https://www.thejakartapost.com/news/2020/04/23/italy-launches-antibody-tests-for-virus-immunity-in-hard-hit-lombardy.html">https://www.thejakartapost.com/news/2020/04/23/italy-launches-antibody-tests-for-virus-immunity-in-hard-hit-lombardy.html</a>                                                                                                                                                        |
| Bremen, Germany<br>(Performa Nord Zentrum für Gesunde Arbeit<br>Arbeitsmedizinischer Dienst) | Neumann (20/04/14).<br>Study on SARS-CoV-2-Serology (COVID-19) in Bremen's public sector.<br><a href="http://www.drks.de/DRKS00021289">http://www.drks.de/DRKS00021289</a>                                                                                                                                                                                                                                                                                                                                                        |
| London, United Kingdom<br>(University College London)                                        | James C Moon, Gabriella Captur, Charlotte Manisty, et al. (20/03/17).<br>COVID-19: Healthcare Worker Bioresource: Immune Protection and Pathogenesis in SARS-CoV-2.<br><a href="https://clinicaltrials.gov/show/NCT04318314">https://clinicaltrials.gov/show/NCT04318314</a>                                                                                                                                                                                                                                                      |
| Geneva, Geneva, Switzerland<br>(University Hospitals of Geneva)                              | University Hospitals of Geneva (20/05/22).<br>Première Estimation De La Prévalence D'anticorps Anti-SARS-CoV-2 IgG Dans La Population Genevoise.<br><a href="https://www.hug-ge.ch/medias/communiqué-presse/seroprevalence-covid-19-premiere-estimation">https://www.hug-ge.ch/medias/communiqué-presse/seroprevalence-covid-19-premiere-estimation</a>                                                                                                                                                                           |
| United States<br>(Crush The Curve Idaho)                                                     | Ryan Morrison (20/04/22).<br>CrushTheCurveIdaho finds small population with antibodies: 'We are far from herd immunity'.<br><a href="https://idahonews.com/news/coronavirus/crushthecurveidaho-finds-small-population-with-antibodies-we-are-far-from-herd-immunity">https://idahonews.com/news/coronavirus/crushthecurveidaho-finds-small-population-with-antibodies-we-are-far-from-herd-immunity</a>                                                                                                                           |
| Miami, Florida, United States<br>(Miami-Dade County; University of Miami)                    | Ben Cornark (20/04/24).<br>Miami-Dade has tens of thousands of missed coronavirus infections, UM survey finds<br><a href="https://www.miamiherald.com/news/coronavirus/article242260406.html">https://www.miamiherald.com/news/coronavirus/article242260406.html</a>                                                                                                                                                                                                                                                              |
| Scottsdale, Tucson, Arizona, United States<br>(ARCpoint Labs)                                | Amanda Morris (20/04/27).<br>People look to COVID-19 antibody testing for answers, but no test offers guarantees.<br><a href="https://www.azcentral.com/story/news/local/arizona-health/2020/04/27/questions-linger-covid-19-antibody-tests-even-demand-grows/5170052002/">https://www.azcentral.com/story/news/local/arizona-health/2020/04/27/questions-linger-covid-19-antibody-tests-even-demand-grows/5170052002/</a>                                                                                                        |
| North Carolina, United States<br>(Atrium Health)                                             | Michael Runyon, MD, MPH;Melanie Hogg, MS (20/04/30).<br>A Prospective Study of COVID-19 Using Real-Time Syndromic Surveillance, Scheduled At-home Serologic Testing, and Electronic Health Records.<br><a href="https://clinicaltrials.gov/show/NCT04361123">https://clinicaltrials.gov/show/NCT04361123</a>                                                                                                                                                                                                                      |

Supplemental Table 7

| Geography (Primary organization)                                                             | Source                                                                                                                                                                                                                                                                                                                                                                                                                                                                                         |
|----------------------------------------------------------------------------------------------|------------------------------------------------------------------------------------------------------------------------------------------------------------------------------------------------------------------------------------------------------------------------------------------------------------------------------------------------------------------------------------------------------------------------------------------------------------------------------------------------|
| Limoges, France<br>(University Hospital, Limoges)                                            | Laurent FOURCADE, MD;Laurent Fourcade, MD (20/05/02).<br>Comparison of the Proportion of Covid19 Seroconversion of Caregivers Working or Not in the COVID Sector.<br><a href="https://clinicaltrials.gov/show/NCT04353323">https://clinicaltrials.gov/show/NCT04353323</a>                                                                                                                                                                                                                     |
| Royal Oak, Michigan, United States<br>(Beaumont Health)                                      | Jennifer Smith (20/04/15).<br>Michigan doctor claims he will prove how long antibodies stay in the body and if they guarantee coronavirus immunity ...<br><a href="https://www.dailymail.co.uk/news/article-8221957/Michigan-doctor-largest-antibody-test-says-hell-prove-guarantee-immunity.html">https://www.dailymail.co.uk/news/article-8221957/Michigan-doctor-largest-antibody-test-says-hell-prove-guarantee-immunity.html</a>                                                          |
| San Miguel County, Colorado, United States<br>(United Biomedical)                            | Jennifer Smith (20/04/10).<br>Only eight people out of 986 people who were given coronavirus antibody tests in private Colorado study were found to have them...<br><a href="https://www.dailymail.co.uk/news/article-8208613/Scientists-awaiting-results-thousands-antibody-tests-California-Colorado.html">https://www.dailymail.co.uk/news/article-8208613/Scientists-awaiting-results-thousands-antibody-tests-California-Colorado.html</a>                                                |
| Paris, France<br>(Assistance Publique, Hopitaux de Paris)                                    | Isabelle SERMET-GAUDELUS, MD, PhD (20/04/01).<br>Seroprevalence and Antibody Profiling Against SARS-CoV2 in Children and Their Parents.<br><a href="https://clinicaltrials.gov/show/NCT04355533">https://clinicaltrials.gov/show/NCT04355533</a>                                                                                                                                                                                                                                               |
| Denmark<br>(Herlev Hospital)                                                                 | Kasper Iversen, Prof.Henning Bundgaard, Prof.Henrik Ullum, et al. (20/04/15).<br>COVID-19: Investigation of Transmission and Immunisation Among Hospital Staff.<br><a href="https://clinicaltrials.gov/show/NCT04346186">https://clinicaltrials.gov/show/NCT04346186</a>                                                                                                                                                                                                                       |
| Vienna, Austria<br>(Ludwig Boltzmann Institute for Lung Health)                              | Otto C Burghuber (20/04/27).<br>COVID-19 - Infection and Antibody Formation in the Viennese Population - Data From the Vienna Health Study LEAD.<br><a href="https://clinicaltrials.gov/show/NCT04346264">https://clinicaltrials.gov/show/NCT04346264</a>                                                                                                                                                                                                                                      |
| Brazil<br>(Butantan Institute)                                                               | Ricardo Palacios, MD, PhD;Ricardo Palacios, MD, PhD (20/04/21).<br>Assessment of Seroprevalence and Incidence of SARS-CoV-2 Infection and COVID-19 in Brazil.<br><a href="https://clinicaltrials.gov/show/NCT04355338">https://clinicaltrials.gov/show/NCT04355338</a>                                                                                                                                                                                                                         |
| Los Angeles County, California, United States<br>(University of Southern California)         | Leigh Hopper (20/04/20).<br>Early antibody testing suggests COVID-19 infections in L.A. County greatly exceed documented cases.<br><a href="https://news.usc.edu/168987/antibody-testing-results-covid-19-infections-los-angeles-county/">https://news.usc.edu/168987/antibody-testing-results-covid-19-infections-los-angeles-county/</a>                                                                                                                                                     |
| England<br>(University of Oxford)                                                            | Matthew Snape;Iason Vichos;Iason Vichos (19/08/19).<br>Serum Testing of Representative Youngsters: Sero- Epidemiological Survey of England in 2019/2020.<br><a href="https://clinicaltrials.gov/show/NCT04061382">https://clinicaltrials.gov/show/NCT04061382</a>                                                                                                                                                                                                                              |
| Denver, Colorado, United States<br>(National Jewish Health)                                  | Capstick L (20/04/24).<br>National Jewish Is Now Testing for COVID-19 Antibodies. Here's What You Need to Know<br><a href="https://www.5280.com/2020/04/national-jewish-covid-19-antibody-testing-starts-today-heres-what-you-need-to-know/">https://www.5280.com/2020/04/national-jewish-covid-19-antibody-testing-starts-today-heres-what-you-need-to-know/</a>                                                                                                                              |
| Germany<br>(Krankenhaus Reinbek St. Adolf-Stift)                                             | Herzberg (20/04/15).<br>Prospective molecular biological and serological examination for the detection of SARS-CoV-2 (COVID-19) in employees of a hospital of regular care in Germany<br><a href="http://www.drks.de/DRKS00021270">http://www.drks.de/DRKS00021270</a>                                                                                                                                                                                                                         |
| Indiana, United States<br>(Indiana State Department of Public Health;<br>Indiana University) | Richard Solomon (20/04/26).<br>WTHI-TV GENERAL MANAGER AMONG THOUSANDS SELECTED FOR RANDOM TESTING.<br><a href="https://www.wthitv.com/content/news/Testing-has-began-statewide-Our-own-general-manager-was-randomly-selected--569962281.html">https://www.wthitv.com/content/news/Testing-has-began-statewide-Our-own-general-manager-was-randomly-selected--569962281.html</a>                                                                                                               |
| Cleveland, Ohio, United States<br>(Ohio State University Wexner Medical Centre)              | Kaylee Remington (20/04/25).<br>OSU's Wexner Medical Center to begin testing for coronavirus ....<br><a href="https://www.cleveland.com/coronavirus/2020/04/central-ohio-hospitals-to-begin-testing-for-coronavirus-antibodies-though-world-health-organization-raises-questions-about-immunity.htm">https://www.cleveland.com/coronavirus/2020/04/central-ohio-hospitals-to-begin-testing-for-coronavirus-antibodies-though-world-health-organization-raises-questions-about-immunity.htm</a> |
| Albuquerque, New Mexico, United States<br>(TriCore Reference Laboratories)                   | Courtney Allen (20/04/29).<br>TriCore to start testing certain people for COVID-19 antibodies.<br><a href="https://www.krqe.com/health/coronavirus-new-mexico/tricore-to-start-testing-certain-people-for-covid-19-antibodies/">https://www.krqe.com/health/coronavirus-new-mexico/tricore-to-start-testing-certain-people-for-covid-19-antibodies/</a>                                                                                                                                        |
| New York City, New York, United States<br>(New York State Department of Health)              | Lisa Fickenscher (20/05/01).<br>New York quietly conducting coronavirus tests at grocery stores.<br><a href="https://nypost.com/2020/05/01/new-york-conducting-coronavirus-tests-at-grocery-stores/">https://nypost.com/2020/05/01/new-york-conducting-coronavirus-tests-at-grocery-stores/</a>                                                                                                                                                                                                |

Supplemental Table 7

| Geography (Primary organization)                                                                                          | Source                                                                                                                                                                                                                                                                                                                                                                    |
|---------------------------------------------------------------------------------------------------------------------------|---------------------------------------------------------------------------------------------------------------------------------------------------------------------------------------------------------------------------------------------------------------------------------------------------------------------------------------------------------------------------|
| United States<br>(Georgia Department of Public Health)                                                                    | Dakin Andone (20/04/30).<br>This family was randomly selected to take a coronavirus antibody test. Here's what it's like<br><a href="https://www.cnn.com/2020/04/30/health/georgia-antibody-tests/index.html">https://www.cnn.com/2020/04/30/health/georgia-antibody-tests/index.html</a>                                                                                 |
| Louisiana, United States<br>(Christus Health)                                                                             | Jessica Williams (20/04/14).<br>As coronavirus cases increase, this Louisiana hospital system has begun offering immunity tests.<br><a href="https://www.nola.com/news/coronavirus/article_60aa0290-7e66-11ea-8042-8fd928c3ae19.html">https://www.nola.com/news/coronavirus/article_60aa0290-7e66-11ea-8042-8fd928c3ae19.html</a>                                         |
| France<br>(Assistance Publique, Hopitaux de Paris)                                                                        | Pierre HAUSFATER, MD PHD (20/03/11).<br>COVID-19 Seroconversion Among Medical and Paramedical Staff in Emergency, ICU and Infectious Disease Services During the 2020 Epidemic.<br><a href="https://clinicaltrials.gov/show/NCT04304690">https://clinicaltrials.gov/show/NCT04304690</a>                                                                                  |
| Hannover, Germany<br>(Medizinische Hochschule Hannover)                                                                   | Behrens (20/04/07).<br>COVID-19 Contact Study - Immunoreaction after possible SARS-CoV-2 / COVID-19 contact - CoCo Study<br><a href="http://www.drks.de/DRKS00021152">http://www.drks.de/DRKS00021152</a>                                                                                                                                                                 |
| Plattsburgh, New York, United States<br>(New York State Department of Health)                                             | Alina Walentowicz (20/04/24).<br>"Random" antibody-testing, Plattsburgh.<br><a href="https://www.suncommunitynews.com/articles/the-sun/%E2%80%9CRandom%E2%80%9D-antibody-testing-plattsburgh/">https://www.suncommunitynews.com/articles/the-sun/%E2%80%9CRandom%E2%80%9D-antibody-testing-plattsburgh/</a>                                                               |
| Michigan, United States<br>(William Beaumont Hospitals)                                                                   | Matthew Sims, MD, PhD;Maureen Cooney, RN, BSN;Maureen Cooney, RN, BSN (20/04/16).<br>Beaumont Health Large-scale Automated Serologic Testing for COVID-19.<br><a href="https://clinicaltrials.gov/show/NCT04349202">https://clinicaltrials.gov/show/NCT04349202</a>                                                                                                       |
| France<br>(Institut Pasteur)                                                                                              | Bruno HOEN (20/03/27).<br>Sero-epidemiological Study of the SARS-CoV-2 Virus in France: Constitution of a Collection of Human Biological Samples.<br><a href="https://clinicaltrials.gov/show/NCT04325646">https://clinicaltrials.gov/show/NCT04325646</a>                                                                                                                |
| Los Angeles County, California, United States<br>(University of Southern California)                                      | France et al. (20/05/01).<br>USC Student Health begins testing community for antibodies.<br><a href="http://www.uscannenbergmedia.com/2020/05/01/usc-student-health-begins-testing-community-for-antibodies/">http://www.uscannenbergmedia.com/2020/05/01/usc-student-health-begins-testing-community-for-antibodies/</a>                                                 |
| Lebanon , Claremont, New Hampshire, United States<br>(ClearChoiceMD )                                                     | Doyle-Burr (20/04/28).<br>Upper Valley practices begin COVID-19 antibody testing.<br><a href="https://www.vnews.com/Upper-Valley-practices-begin-offering-COVID-19-antibody-tests-34070856">https://www.vnews.com/Upper-Valley-practices-begin-offering-COVID-19-antibody-tests-34070856</a>                                                                              |
| New York City, New York, United States<br>(New York State Department of Health)                                           | Caroline Lewis (20/04/26).<br>Antibody Tests Can't Guarantee Immunity—But New Yorkers Want Them Anyway.<br><a href="https://gothamist.com/news/antibody-tests-cant-guarantee-immunitybut-new-yorkers-want-them-anyway">https://gothamist.com/news/antibody-tests-cant-guarantee-immunitybut-new-yorkers-want-them-anyway</a>                                              |
| Boston, San Francisco, New York City, Seattle, Los Angeles, Minneapolis, United States<br>(National Institutes of Health) | Jon Cohen (20/04/07).<br>Unprecedented nationwide blood studies seek to track U.S. coronavirus spread.<br><a href="https://www.sciencemag.org/news/2020/04/unprecedented-nationwide-blood-studies-seek-track-us-coronavirus-spread#">https://www.sciencemag.org/news/2020/04/unprecedented-nationwide-blood-studies-seek-track-us-coronavirus-spread#</a>                 |
| Davis, California, United States<br>(University of California, Davis)                                                     | Woodland Daily Democrat (20/05/01).<br>UC Davis begins antibody testing for COVID-19.<br><a href="https://www.dailydemocrat.com/uc-davis-begins-antibody-testing-for-covid-19">https://www.dailydemocrat.com/uc-davis-begins-antibody-testing-for-covid-19</a>                                                                                                            |
| United States<br>(National Institutes of Health; Centers for Disease Control and Prevention)                              | Jon Cohen (20/04/07).<br>Unprecedented nationwide blood studies seek to track U.S. coronavirus spread.<br><a href="https://www.sciencemag.org/news/2020/04/unprecedented-nationwide-blood-studies-seek-track-us-coronavirus-spread#">https://www.sciencemag.org/news/2020/04/unprecedented-nationwide-blood-studies-seek-track-us-coronavirus-spread#</a>                 |
| Boston, Massachusetts, United States<br>(Massachusetts General Hospital)                                                  | Alex Newman (20/04/26).<br>Boston To Conduct Random Coronavirus Antibody Testing.<br><a href="https://patch.com/massachusetts/boston/coronavirus-boston-conduct-random-antibody-testing">https://patch.com/massachusetts/boston/coronavirus-boston-conduct-random-antibody-testing</a>                                                                                    |
| Germany<br>(Brunswick's Helmholtz Institute for Infectious Disease Research)                                              | AFP (20/03/27).<br>Germany plans mass study to track immunity to coronavirus.<br><a href="https://www.thelocal.de/20200327/germany-plans-mass-immunity-study-to-track-virus">https://www.thelocal.de/20200327/germany-plans-mass-immunity-study-to-track-virus</a>                                                                                                        |
| Ukraine<br>(Ukraine Government)                                                                                           | Daryna Antoniuk (20/04/23).<br>Deputy health minister: Ukraine may launch mass COVID-19 antibody testing<br><a href="https://www.kyivpost.com/ukraine-politics/deputy-health-minister-ukraine-may-launch-mass-covid-19-antibody-testing.html">https://www.kyivpost.com/ukraine-politics/deputy-health-minister-ukraine-may-launch-mass-covid-19-antibody-testing.html</a> |

Supplemental Table 7

| Geography (Primary organization)                                      | Source                                                                                                                                                                                                                                                                                                                                                                                                      |
|-----------------------------------------------------------------------|-------------------------------------------------------------------------------------------------------------------------------------------------------------------------------------------------------------------------------------------------------------------------------------------------------------------------------------------------------------------------------------------------------------|
| Singapore, Singapore<br>(National Centre for Infectious Diseases)     | Rei Kurohi (20/04/29).<br>Coronavirus: Community transmission in S'pore very low.<br><a href="https://www.straitstimes.com/singapore/health/coronavirus-community-transmission-in-spore-very-low-but-so-is-herd-immunity-says">https://www.straitstimes.com/singapore/health/coronavirus-community-transmission-in-spore-very-low-but-so-is-herd-immunity-says</a>                                          |
| Kolar, Karnataka, India<br>(Kolar State Government; Tata Group)       | Madhavan (20/04/30).<br>Pilot project for random testing to begin in Kolar from Thursday.<br><a href="https://www.newindianexpress.com/states/karnataka/2020/apr/30/pilot-project-for-random-testing-to-begin-in-kolar-from-thursday-2137269.html">https://www.newindianexpress.com/states/karnataka/2020/apr/30/pilot-project-for-random-testing-to-begin-in-kolar-from-thursday-2137269.html</a>          |
| United States<br>(Baystate Health)                                    | Kinney (20/04/20).<br>Baystate Health CEO Dr. Mark Keroack hopes to begin local antibody testing for coronavirus<br><a href="https://www.masslive.com/news/2020/04/baystate-health-ceo-dr-mark-keroack-hopes-to-begin-local-antibody-testing-for-coronavirus.html">https://www.masslive.com/news/2020/04/baystate-health-ceo-dr-mark-keroack-hopes-to-begin-local-antibody-testing-for-coronavirus.html</a> |
| Baton Rouge, Florida, United States<br>(Baton Rouge General Hospital) | Blake Paterson (20/04/28).<br>Takeaways from coronavirus antibody tests: Infections might be more widespread than cases suggest<br><a href="https://www.theadvocate.com/baton_rouge/news/coronavirus/article_b499efa0-8983-11ea-a3f1-af936ecb1d2c.html">https://www.theadvocate.com/baton_rouge/news/coronavirus/article_b499efa0-8983-11ea-a3f1-af936ecb1d2c.html</a>                                      |
| Gangelt, Heinsberg, Germany<br>(University Hospital of Bonn)          | Antonio Regalado (20/04/09).<br>Blood tests show 14% of people are now immune to covid-19 in one town in Germany<br><a href="https://www.technologyreview.com/2020/04/09/999015/blood-tests-show-15-of-people-are-now-immune-to-covid-19-in-one-town-in-germany/">https://www.technologyreview.com/2020/04/09/999015/blood-tests-show-15-of-people-are-now-immune-to-covid-19-in-one-town-in-germany/</a>   |
| Seattle, Washington, United States<br>(University of Washington)      | Anne Schuchat (20/05/01).<br>Public Health Response to the Initiation and Spread of Pandemic COVID-19 in the United States, February 24–April 21, 2020.<br><a href="https://www.cdc.gov/mmwr/volumes/69/wr/pdfs/mm6918e2-H.pdf">https://www.cdc.gov/mmwr/volumes/69/wr/pdfs/mm6918e2-H.pdf</a>                                                                                                              |
| Wuhan, Hubei, China<br>(Tongji Hospital; Tongji Medical College)      | Yan Hao, Xiaoping Luo (20/03/15).<br>Epidemiological Characteristics and Antibody Levels of COVID-19 Infection of Pediatric Medical Staff working in Quarantine Area<br><a href="http://www.chictr.org.cn/showproj.aspx?proj=51047">http://www.chictr.org.cn/showproj.aspx?proj=51047</a>                                                                                                                   |
| Australia<br>(Albury Wodonga Health)                                  | Jackson, J (20/04/07).<br>Prospective study evaluating the proportion of SARS-CoV-2 (COVID-19) antibody seroconversion in frontline health care workers<br><a href="https://anzctr.org.au/ACTRN12620000493943.aspx">https://anzctr.org.au/ACTRN12620000493943.aspx</a>                                                                                                                                      |
| United Kingdom<br>(Queen's University, Belfast)                       | Thomas Waterfield (20/04/08).<br>Rapid Diagnostics, Antibody Testing and Host Response in Children With COVID-19.<br><a href="https://clinicaltrials.gov/show/NCT04347408">https://clinicaltrials.gov/show/NCT04347408</a>                                                                                                                                                                                  |
| Canada<br>(Government of Canada)                                      | Tonda MacCharles (20/04/23).<br>Trudeau bets on COVID-19 blood tests for now as Canada ramps up long effort for a vaccine.<br><a href="https://www.thestar.com/politics/federal/2020/04/23/justin-trudeau-boosts-money-for-covid-19-research.html">https://www.thestar.com/politics/federal/2020/04/23/justin-trudeau-boosts-money-for-covid-19-research.html</a>                                           |
